# Supplementary material
Source: publisher figshare collection journal article supplement (https://acs.figshare.com/ndownloader/files/8500685)
Supplement: Supplementary file 1 [file 8500685]

## Supporting information

### Modulation of electron-phonon coupling in one-dimensionally nanorippled graphene on a macrofacet of 6H-SiC

Koichiro Ienaga,<sup>+,\*,\*\*</sup> Takushi Iimori,<sup>+</sup> Koichiro Yaji,<sup>+</sup> Toshio Miyamachi,<sup>+</sup>  
Shuhei Nakashima,<sup>+</sup> Yukio Takahashi,<sup>+</sup> Kohei Fukuma,<sup>++</sup> Shingo Hayashi,<sup>++</sup>  
Takashi Kajiwara,<sup>++</sup> Anton Visikovskiy,<sup>++</sup> Kazuhiko Mase,<sup>#,||</sup> Kan Nakatsuji,<sup>^^</sup>  
Satoru Tanaka,<sup>++</sup> and Fumio Komori,<sup>+,\*</sup>

<sup>+</sup>Institute for Solid State Physics, The University of Tokyo,  
5-1-5 Kashiwanoha, Kashiwa, Chiba 277-8581, Japan

<sup>++</sup>Department of Applied Quantum Physics and Nuclear Engineering,  
Kyushu University, Fukuoka 819-0395, Japan

<sup>#</sup>Institute of Materials Structure Science, High Energy Accelerator  
Research Organization (KEK), Tsukuba 305-0801, Japan

<sup>||</sup>Department of Materials Structure Science, SOKENDAI (The Graduate University for  
Advanced Studies), 1-1 Oho, Tsukuba 305-0801, Japan

<sup>^^</sup>Department of Materials Science and Engineering, Tokyo Institute of Technology,  
Yokohama 226-8502, Japan

\*E-mail: ienaga.k.aa@m.titech.ac.jp; [komori@issp.u-tokyo.ac.jp](mailto:komori@issp.u-tokyo.ac.jp)

\*\* Present address: Department of Physics, Tokyo Institute of Technology,  
2-12-1 Ohokayama, Meguro, Tokyo, Japan

Supporting figure:

Figure S1 STS modulation in a wide area

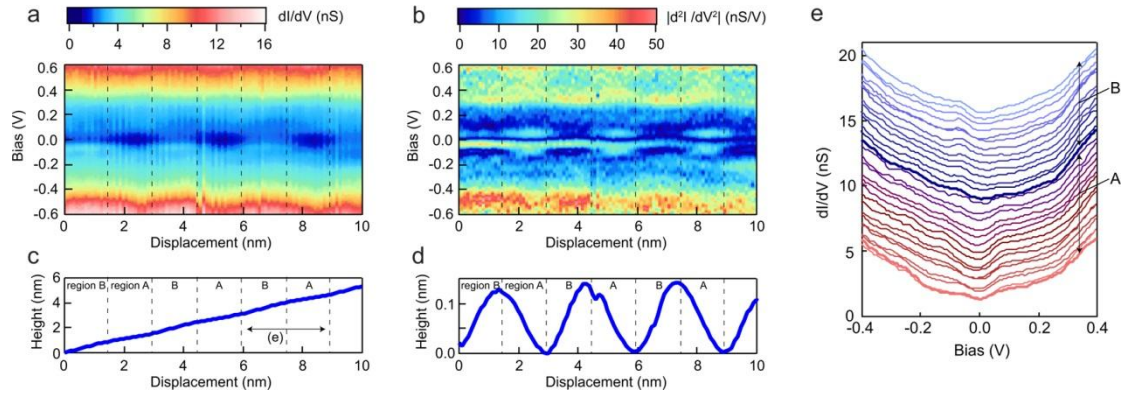

Figure S1 (a,b)  $dI/dV$  and  $|d^2I/dV^2|$  spectra on a macrofacet shown as images on a 10 nm line of the  $[1\cdot100]$  direction. In the regions A, dips of the  $dI/dV$  spectra at zero bias voltage are deeper than those in the regions B. The tip was fixed with the condition that the sample bias voltage was 0.6 V and the tunneling current was 3.0 nA. (c, d) Height profiles of the macrofacet area where the spectra were measured. In (c) the horizontal axis is parallel to the SiC(0001) terrace while in (d) it is parallel to the macrofacet face. (e) Line plots of a part of the  $dI/dV$  spectra.
